# Supplementary material for: Cell Senescence: A Nonnegligible Cell State under Survival Stress in Pathology of Intervertebral Disc Degeneration
Source: Hindawi journal article supplement (doi:10.1155/2020/9503562), 2020-08-31
Supplement: f1 [file 9503562.f1.pdf]

## Supporting Information

### Cell Senescence: A Nonnegligible Cell State under Survival Stress in Pathology of Intervertebral Disc Degeneration

Yuang Zhang,<sup>1,2</sup> Biao Yang,<sup>1,2</sup> Jingkai Wang,<sup>1,2</sup> Feng Cheng,<sup>1,2</sup> Kesi Shi,<sup>1,2</sup> Liwei  
Ying,<sup>1,2</sup> Chenggui Wang,<sup>1,2</sup> Kaishun Xia,<sup>1,2</sup> Xianpeng Huang,<sup>1,2</sup> Zhe Gong,<sup>1,2</sup> Chao  
Yu,<sup>1,2</sup> Fangcai Li,<sup>1,2</sup> Chengzhen Liang,<sup>1,2</sup> and Qixin Chen<sup>1,2</sup>

<sup>1</sup>Department of Orthopedics Surgery, The Second Affiliated Hospital, Zhejiang  
University School of Medicine, 310009 Hangzhou, Zhejiang, China.

<sup>2</sup>Zhejiang Key Laboratory of Bone and Joint Precision and Department of  
Orthopedics Research Institute of Zhejiang University, Hangzhou, Zhejiang 310009,  
China.

Correspondence should be addressed to Fangcai Li; [lifangcai@zju.edu.cn](mailto:lifangcai@zju.edu.cn) or  
Chengzhen Liang; [liangchengzhen@zju.edu.cn](mailto:liangchengzhen@zju.edu.cn) or Qixin Chen; [zrcqx@zju.edu.cn](mailto:zrcqx@zju.edu.cn)

#### Contents

##### 1. The List of Abbreviations

| Abbreviation                  |                                                                |
|-------------------------------|----------------------------------------------------------------|
| IDD                           | intervertebral disc degeneration                               |
| LBP                           | low back pain                                                  |
| YLD                           | years lived with disability                                    |
| SASP                          | senescence associated secretory phenotype                      |
| RS                            | replicative-related senescence                                 |
| SIPS                          | stress-induced premature senescence                            |
| SA- $\beta$ -gal              | senescence associated $\beta$ -galactosidase                   |
| PDGF-AA                       | platelet-derived growth factor AA                              |
| AER                           | apical ectodermal ridge                                        |
| MiDAS                         | mitochondrial dysfunction-associated senescence                |
| ROS                           | reactive oxygen species                                        |
| NP                            | nucleus pulposus                                               |
| AF                            | annulus fibrosus                                               |
| EPs                           | endplates                                                      |
| ECM                           | extracellular matrix                                           |
| TS                            | tail suspension                                                |
| PG                            | proteoglycan                                                   |
| CECSC                         | cartilage endplate stem cell                                   |
| OA                            | osteoarthritis                                                 |
| DDR                           | DNA damage response                                            |
| H <sub>2</sub> O <sub>2</sub> | hydrogen peroxide                                              |
| $\cdot\text{O}_2^-$           | superoxide anion                                               |
| $\cdot\text{OH}$              | hydroxyl                                                       |
| MMP                           | matrix metalloproteinase                                       |
| ADAMTs                        | a disintegrin and metalloproteinase with thrombospondin motifs |
| OP                            | osteoporosis                                                   |
| anti-B2MG                     | beta-2-microglobulin antibody                                  |
| RB                            | retinoblastoma                                                 |
| NF- $\kappa$ B                | nuclear factor kappa-B                                         |
| cGAS/STING                    | cyclic GMP-AMP synthase/ stimulator of interferon genes        |
| IL-1                          | interleukin-1                                                  |
| IL-6                          | interleukin-6                                                  |
| IL-8                          | interleukin-8                                                  |
| mTOR                          | mammalian Target of Rapamycin                                  |
| DNA                           | deoxyribonucleic acid                                          |
| FGFs                          | fibroblast growth factors                                      |
| AMPK                          | adenosine 5'-monophosphate-activated protein kinase            |

|                  |                                                             |
|------------------|-------------------------------------------------------------|
| IL-1 $\beta$     | interleukin-1 $\beta$                                       |
| TNF- $\alpha$    | tumor necrosis factor- $\alpha$                             |
| CCL-2            | chemokine (C–C motif) ligand2                               |
| VEGF             | vascular endothelial growth factor                          |
| TGF- $\beta$     | transforming growth factor $\beta$                          |
| CCL-20           | chemokine (C–C motif) ligand 20                             |
| TSP1-CD47        | thrombospondin 1- cluster of differentiation 47             |
| OS               | oxidative stress                                            |
| NADPH            | nicotinamide adenine dinucleotide phosphate                 |
| ATM-Chk2-p53-p21 | ataxia telangiectasia mutated-checkpoint kinase 2-p53-p21   |
| Nrf2             | nuclear factor E2 related factor 2                          |
| Keap1            | Kelch-like ECH-Associating protein 1                        |
| HO-1             | hemeoxygenase 1                                             |
| NOX4             | NADPH oxidase 4                                             |
| PARK2            | parkinson protein 2                                         |
| Wnt              | wingless / integration-1                                    |
| CARD14           | caspase recruitment domain 14                               |
| EFHD2            | EF-hand domain-containing protein D2                        |
| RTKN2            | Rhotekin 2                                                  |
| MAPKAPK5         | mitogen-activated protein kinase-activated protein kinase 5 |
| PRKCZ            | protein kinase C/ $\zeta$                                   |
| MAPK             | mitogen-activated protein kinase                            |
| RNA              | ribonucleic acid                                            |
| miR-132          | microRNA-132                                                |
| miR-494          | microRNA-494                                                |
| SPARC            | secreted protein acidic and rich in cysteine                |
| H3K27me3         | trimethylation of lysine 27 on histone 3                    |
| Chk2             | checkpoint kinase 2                                         |
| WNT5A            | wingless / integration 5A                                   |
| miR-21           | microRNA-21                                                 |
| miR-146a         | microRNA-146a                                               |
| miR-98           | microRNA-98                                                 |
| PDCD4            | programmed cell death 4                                     |
| TRAF6            | TNF receptor associated factor 6                            |
| STAT3            | signal transducer and activator of transcription 3          |
| SOX9             | Sry related HMG box 9                                       |
| GDF5             | growth and differentiation factor 5                         |
| Eph              | ephrin                                                      |
| PI3K/AKT         | phosphatidylinositol 3 kinase/protein kinase B              |
| AFSCs            | annulus fibrosus stem cells                                 |

|                  |                                               |
|------------------|-----------------------------------------------|
| FOXO4            | forkhead box O4                               |
| NAD <sup>+</sup> | nicotinamide adenine dinucleotide             |
| uPAR             | urokinase-type plasminogen activator receptor |
| CAR              | chimeric antigen receptor                     |
